# Supplementary material
Source: PubMed Central journal article supplement (PMC10091898)
Supplement: NIHMS1878813-supplement-Supplementary_information.pdf [file NIHMS1878813-supplement-Supplementary_information.pdf]

**Supplementary Table 1. Oligonucleotides and plasmids**

| Oligonucleotides (5'→3')                                                                                           | Lab Stock # |
|--------------------------------------------------------------------------------------------------------------------|-------------|
| DNA-RNA release assay non-template DNA<br>GGCGTACCCTTTTATTACGCGCAATACCCATCGATCGATCG                                | 15217       |
| DNA-RNA release assay template DNA<br>CGATCGATCGATGGGTATTCGCCGTGAATAAAAAGGGTACGCC                                  | 15218       |
| DNA-RNA release assay RNA<br>ACGCGUCGCAGGCCUUUUUAU                                                                 | 15131       |
| DNA-RNA release assay asRNA<br>GGCCUGCGACGA                                                                        | 15132       |
| Scaffold-based termination assay non-template DNA<br>CGCTGTACTGGTAATCGCAGGCCTTTTTATTTGGGAGAGGGAAGT<br>CGCTTCCAGTGG | 14380       |
| Scaffold-based termination assay template DNA<br>CCACTGGAAGCGACTTCCCTCTCCCAAATAAAAAGGCCTGCGATT<br>ACCAGTACAGCG     | 14379       |
| Scaffold-based termination assay RNA<br>UUUUUUAGGCCUGCUGGUAUCG                                                     | 14375       |
| <u>Mapping termination HP stem position that triggers termination asDNA</u><br>CCATACAACCTCCTTACTACAT              | 14483       |
| <u>Mapping termination HP stem position that triggers termination asRNA (-8)</u><br>GGCCAGGCAUUACC                 | 14751       |
| <u>Mapping termination HP stem position that triggers termination asRNA (-9)</u><br>GCCAGGCAUUACC                  | 15160       |
| <u>Mapping termination HP stem position that triggers termination asRNA (-10)</u><br>CCAGGCAUUACC                  | 15127       |
| <u>Mapping termination HP stem position that triggers termination asRNA (-11)</u><br>CAGGCAUUACC                   | 15128       |
| <u>Mapping termination HP stem position that triggers termination asRNA (-12)</u><br>AGGCAUUACCU                   | 15161       |
| <u>Mapping termination HP stem position that triggers termination asRNA (-13)</u><br>GGCAUUACCUA                   | 15162       |
| <u>Mapping termination HP stem position that triggers termination asRNA (-14)</u><br>GCAUUACCUAU                   | 15163       |
| <u>Mapping termination HP stem position that triggers termination asRNA (-15)</u><br>CAUUACCUAUU                   | 15164       |
| non-template DNA for cryo-EM structures of TTC-pause and TTC-hairpin<br>GGCGTACGGAAAATAACACGCGCAATACCC             |             |
| non-template DNA for cryo-EM structure of TTC-release<br>GGCGTACCCTTTTATTACGCGCAATACCC                             |             |
| template DNA for cryo-EM structures of TTC-pause, TTC-hairpin, and TTC-release<br>GGGTATTCGCCGTGAATAAAAAGGGTACGCC  |             |
| RNA for cryo-EM structures of TTC-pause and TTC-hairpin<br>GCGUCGCAGGCCUUUUUAU                                     |             |
| RNA for cryo-EM structure of TTC-release<br>Cy5-ACGCGUCGCAGGCCUUUUUAU                                              |             |

|                                                                                                                                                                                                                   |                  |
|-------------------------------------------------------------------------------------------------------------------------------------------------------------------------------------------------------------------|------------------|
| antisense RNA10 (asRNA10) for cryo-EM structure of TTC-hairpin<br>CCUGCGACGC                                                                                                                                      |                  |
| antisense RNA12 (asRNA12) for cryo-EM structure of TTC-release<br>GGCCUGCGACGA                                                                                                                                    |                  |
| <b>Plasmids</b>                                                                                                                                                                                                   | <b>Reference</b> |
| pRL706 – $\beta$ -overexpression plasmid. His6-tag on <i>rpoB</i> C terminus                                                                                                                                      | 1                |
| pRL706 <i>rpoB</i> D446A (pEO9) – $\beta$ derivative-overexpression plasmid                                                                                                                                       | this work        |
| pRL706 <i>rpoB</i> R465A (pEO10) – $\beta$ derivative-overexpression plasmid                                                                                                                                      | this work        |
| pRL706 <i>rpoB</i> R180A-V469A – $\beta$ derivative-overexpression plasmid                                                                                                                                        | this work        |
| pRM1235 – $\lambda$ P <sub>R</sub> WT $\lambda$ T <sub>R2</sub> terminator sequence                                                                                                                               | this work.       |
| pRM1065 – Harbors a variant of $\lambda$ T <sub>R2</sub> terminator with DS DNA changed                                                                                                                           | 2                |
| pRM1066 – Harbors WT $\phi$ t <sub>500</sub> terminator                                                                                                                                                           | 2                |
| pRM1234 – Harbors a variant of $\lambda$ T <sub>R2</sub> terminator lacking the upstream half of the terminator hairpin                                                                                           | this work        |
| pET28a-TEV- <i>Eco</i> $\sigma^{70}$ – $\sigma^{70}$ -overexpression plasmid                                                                                                                                      | this work        |
| pEcABC – $\alpha\beta\beta'$ -overexpression plasmid. His6-tag on <i>rpoC</i> C terminus                                                                                                                          | 3                |
| pCDF- <i>EcrpoZ</i> – $\omega$ -overexpression plasmid                                                                                                                                                            | 3                |
|                                                                                                                                                                                                                   |                  |
| <b>Strains</b>                                                                                                                                                                                                    |                  |
| RL1204 <i>E. coli</i> K-12 $\lambda^-$ F <sup>-</sup> <i>trpR tnaA2 rpoB520I</i> (SPA) $\Delta$ ( <i>recA-srl</i> )306<br><i>srl301::Tn10-84</i> . A <i>recA</i> <sup>-</sup> derivative of RL1120 <sup>4</sup> . | This work.       |

#### Supplementary references

- 1 Severinov, K., Mooney, R., Darst, S. A. & Landick, R. Tethering of the large subunits of Escherichia coli RNA polymerase. *J Biol Chem* **272**, 24137-24140, doi:DOI 10.1074/jbc.272.39.24137 (1997).
- 2 Bellecourt, M. J., Ray-Soni, A., Harwig, A., Mooney, R. A. & Landick, R. RNA Polymerase Clamp Movement Aids Dissociation from DNA but Is Not Required for RNA Release at Intrinsic Terminators. *J Mol Biol* **431**, 696-713, doi:10.1016/j.jmb.2019.01.003 (2019).
- 3 Hudson, B. P. *et al.* Three-dimensional EM structure of an intact activator-dependent transcription initiation complex. *P Natl Acad Sci USA* **106**, 19830-19835, doi:10.1073/pnas.0908782106 (2009).
- 4 Opalka, N. *et al.* Direct localization of a beta-subunit domain on the three-dimensional structure of Escherichia coli RNA polymerase. *Proc Natl Acad Sci U S A* **97**, 617-622, doi:10.1073/pnas.97.2.617 (2000).

### **Legends for supplementary videos**

Supplementary Video 1. Cryo-EM map and structural analysis of TTC-pause.

Supplementary Video 2. Cryo-EM map and structural analysis of TTC-hairpin.

Supplementary Video 3. A proposed route for rewinding of the -10 nucleotides.

Supplementary Video 4. Cryo-EM map and structural analysis of TTC-release.

## Supplementary Figure 1

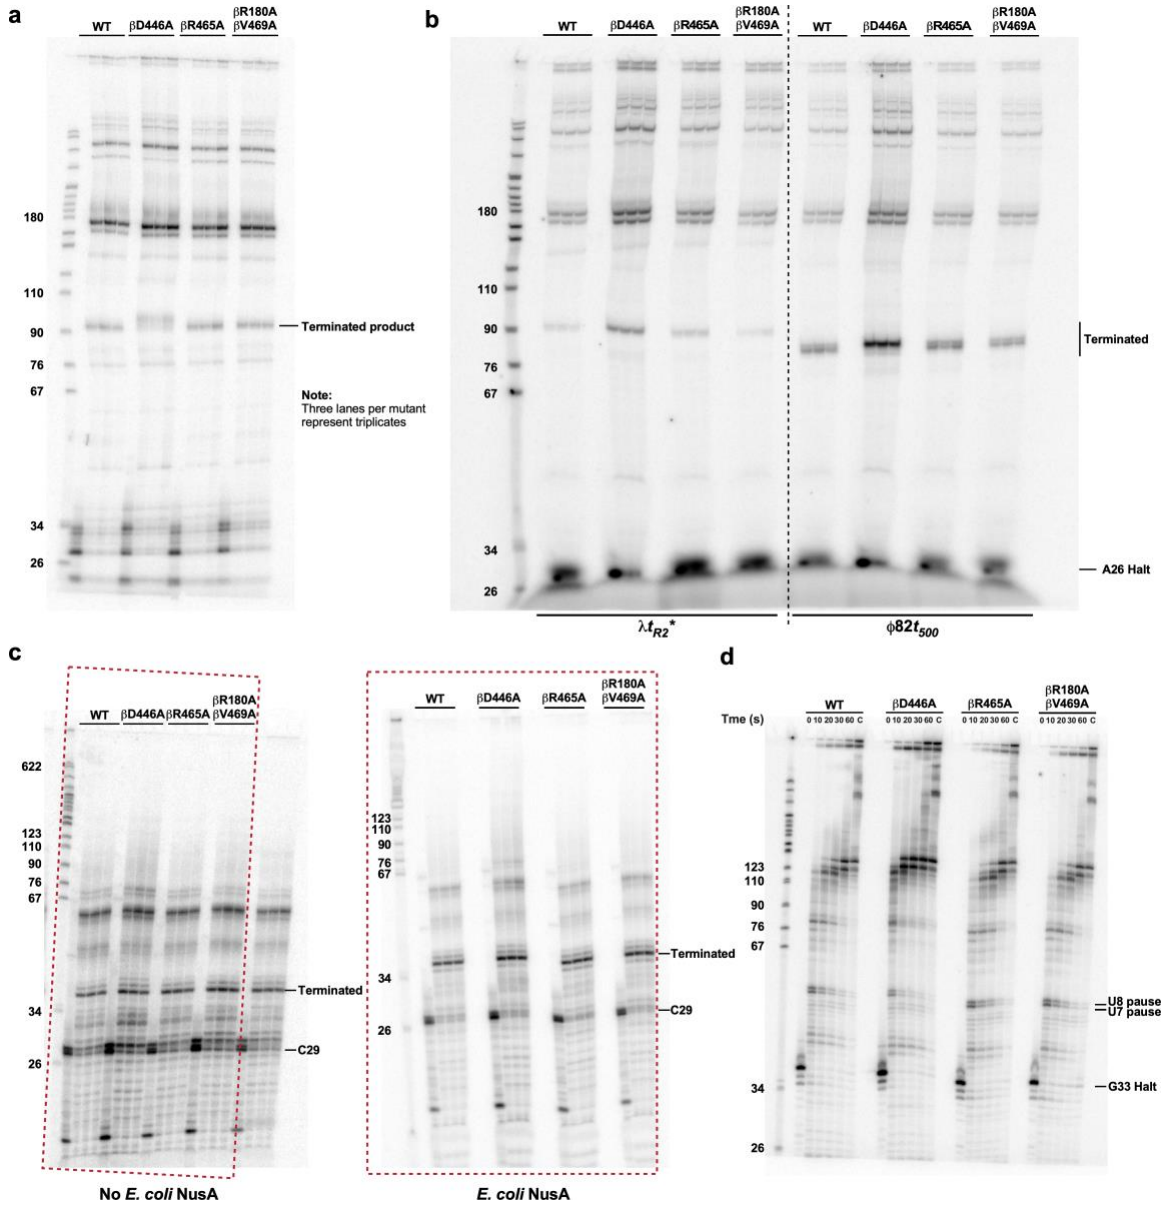

Supplementary Figure 1a-d. The raw data of three replicates for Extended Data Figure 3c (a), 3d-3e (b), 3f (c), and 3g (d).

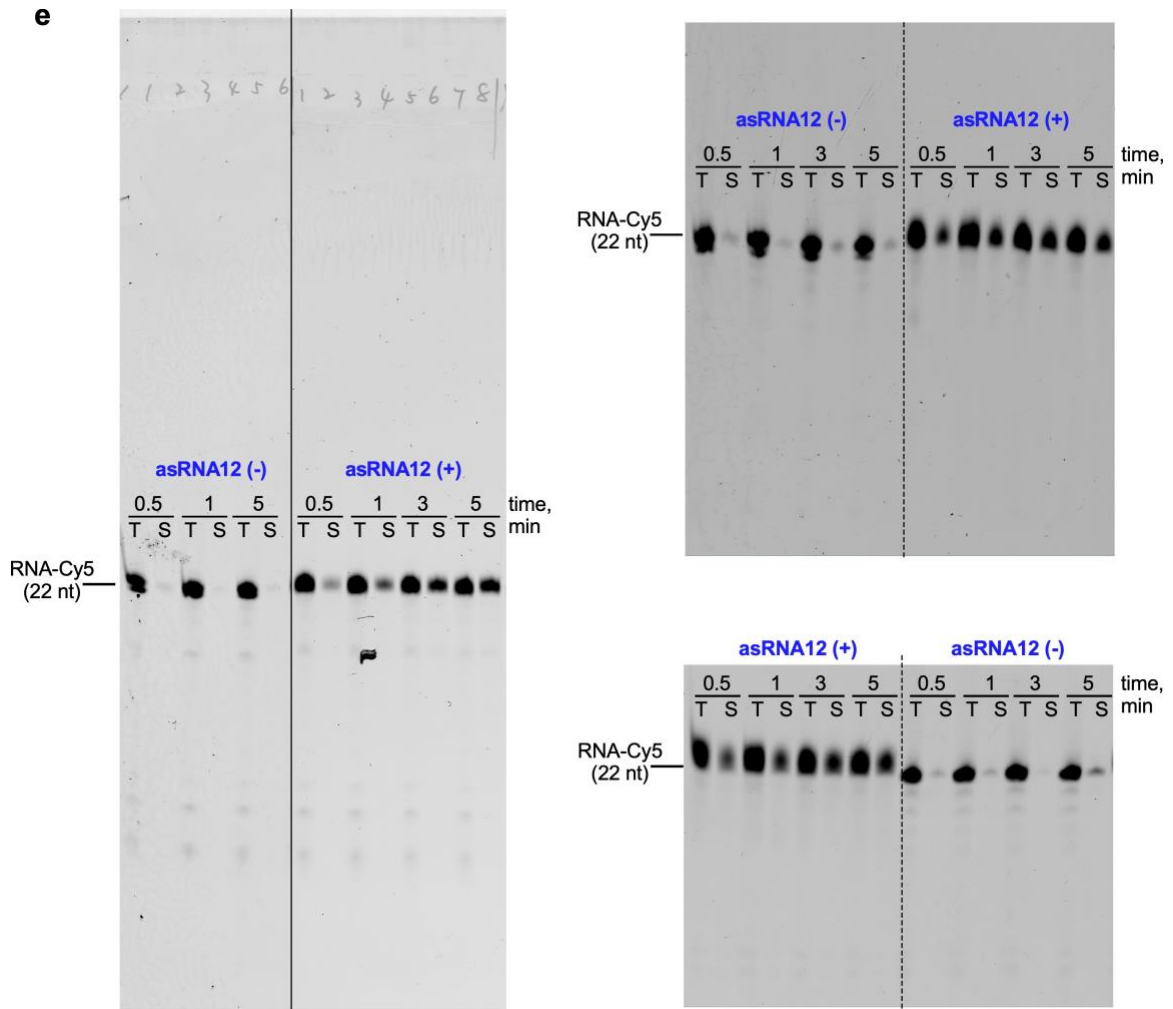

**Supplementary Figure 1e. The raw data for Figure 3b.** The left panel shows the uncropped gel for Figure 3b and the right panels show two additional replicates.

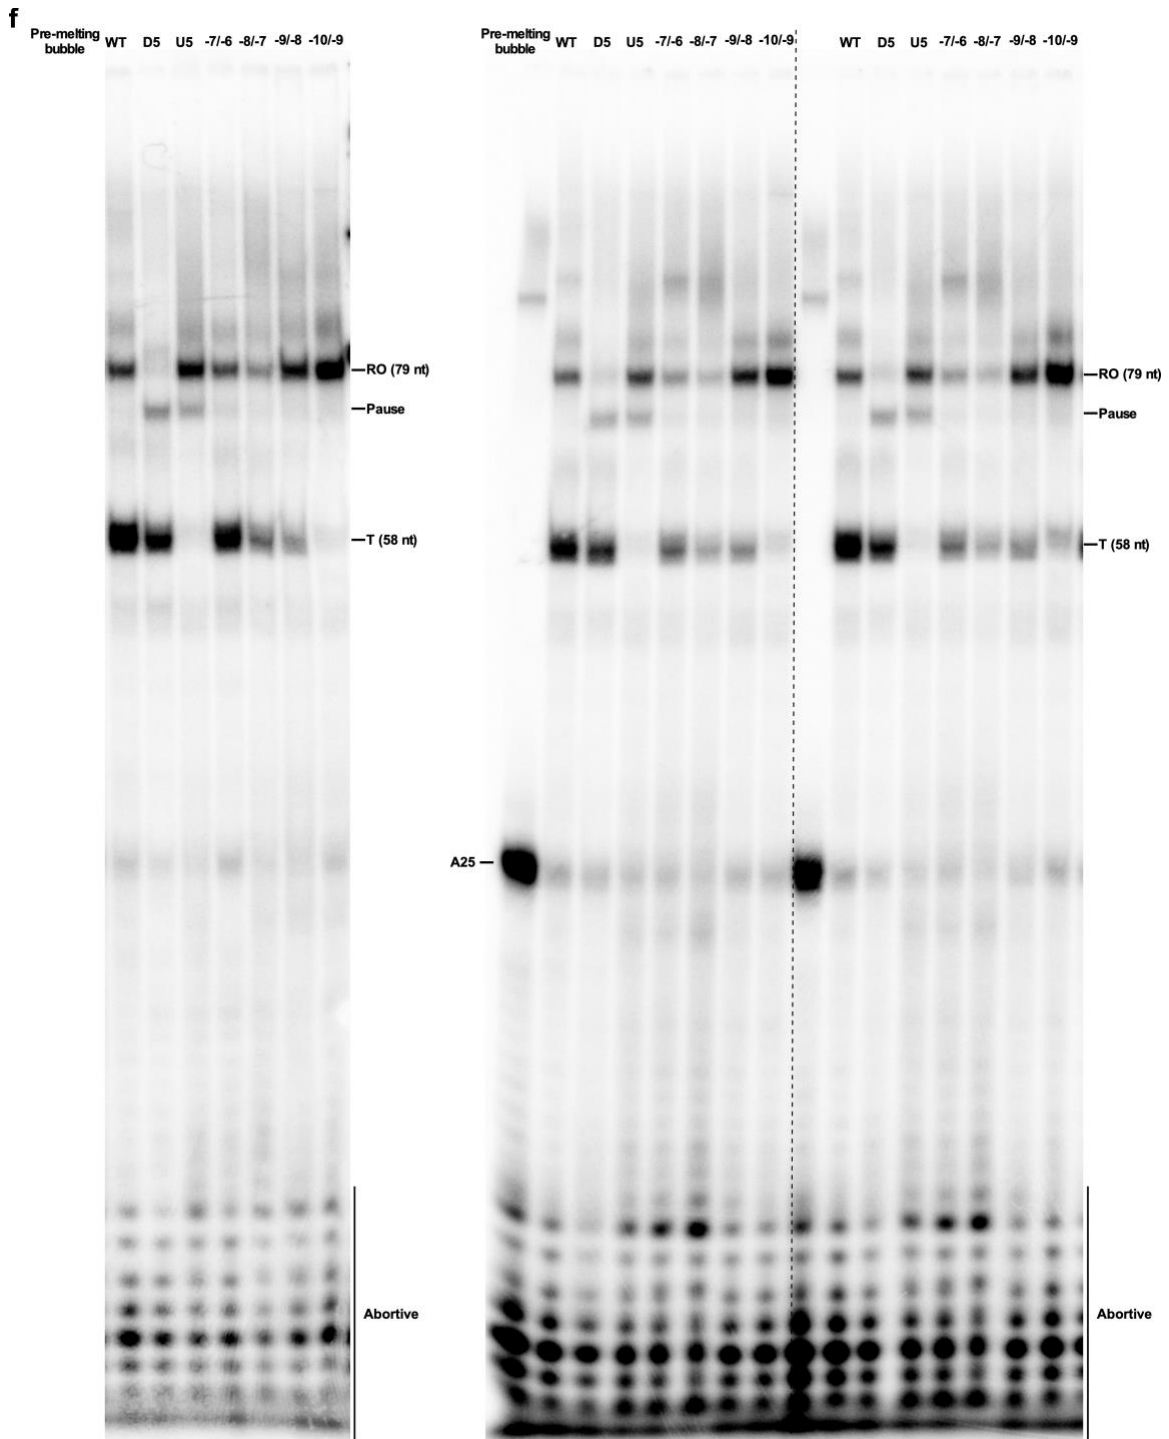

**Supplementary Figure 1f. The raw data for Figure 3g.** The left panel shows the uncropped gel for Figure 3g and the right panels show uncropped gel for two additional replicates.

**g**

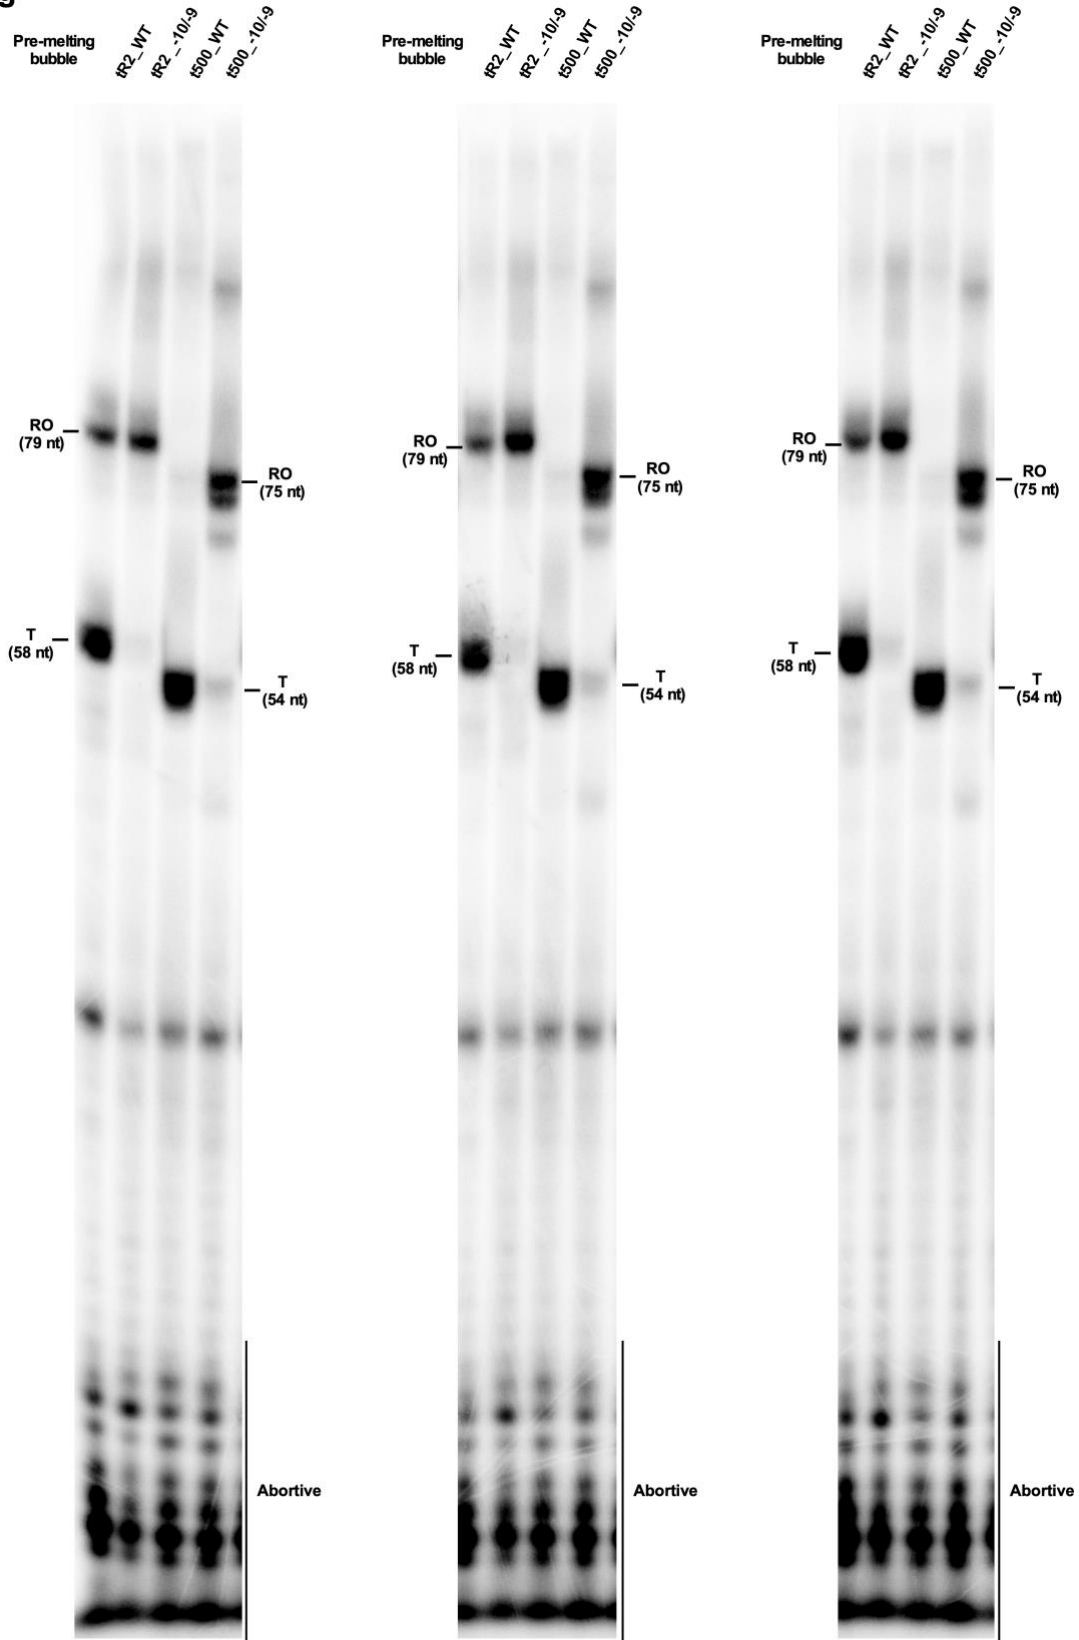

Supplementary Figure 1g. The raw data of three replicates for Extended Data Figure 8b.

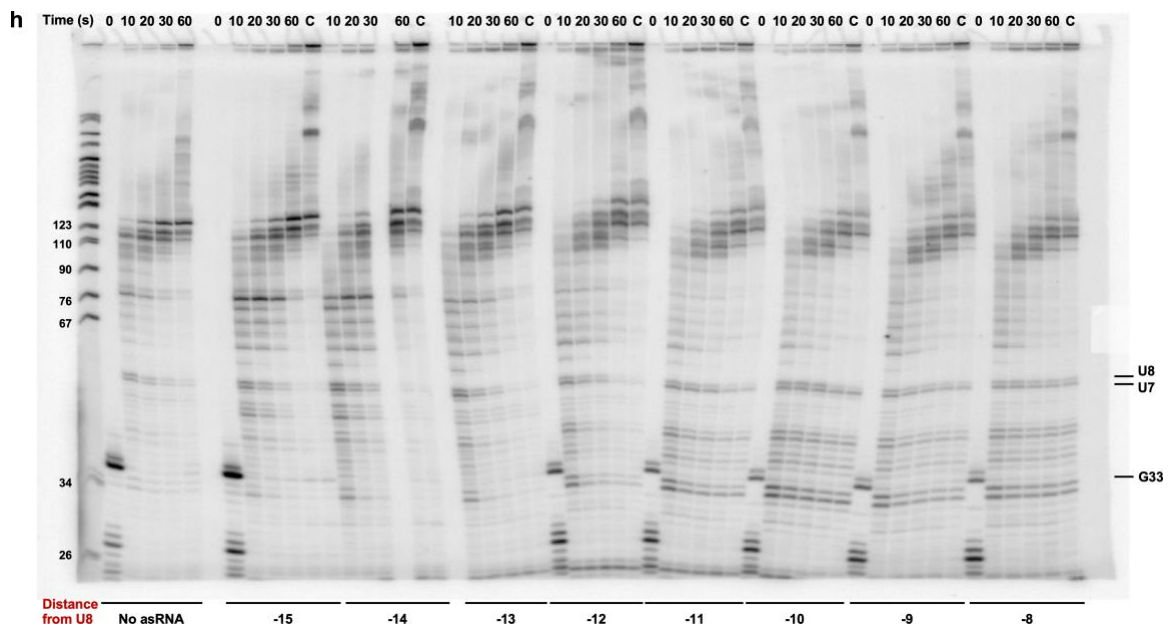

**Supplementary Figure 1h. The raw data for Extended Data Figure 8c.**



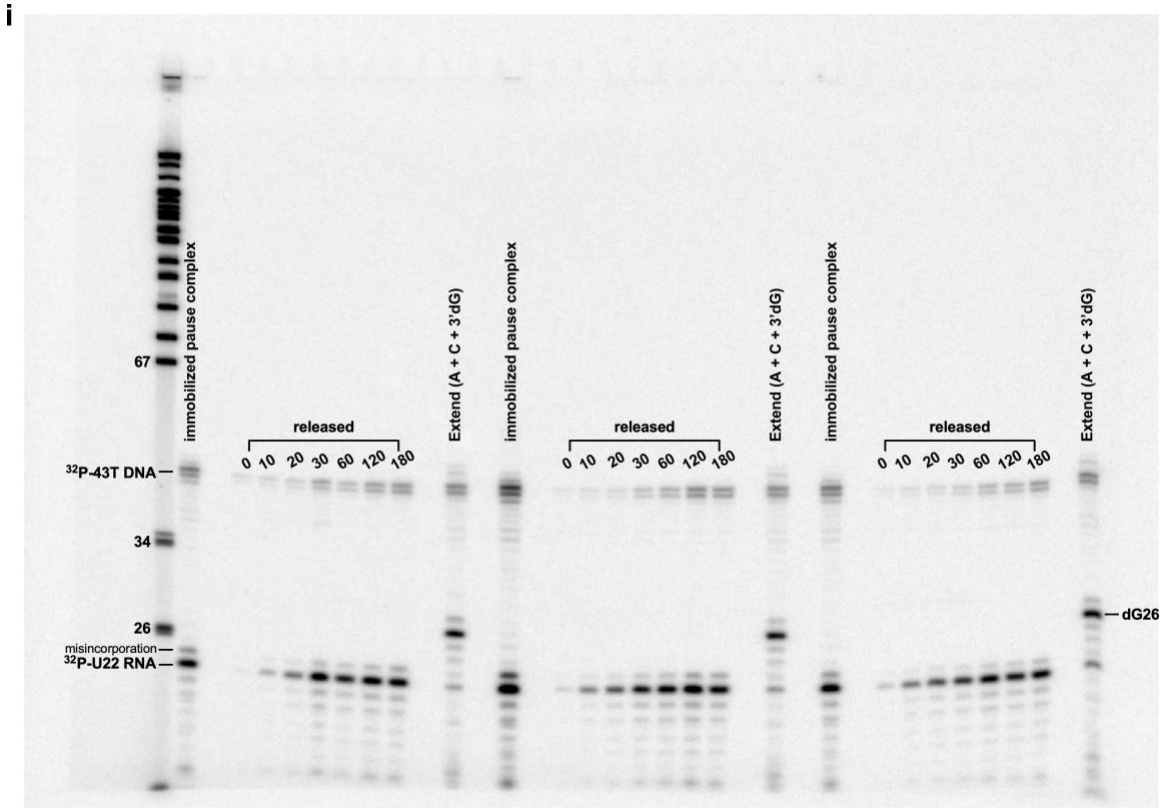

**Supplementary Figure 1i. The raw data of three replicates for Figure 3h.**
